# Supplementary material
Source: PubMed Central journal article supplement (PMC4196746)
Supplement: la501985p_si_001.pdf [file la501985p_si_001.pdf]

## Supporting Information for Langmuir

### Biocompatible Nanoparticles of Coordination Polymer

### KGd(H<sub>2</sub>O)<sub>2</sub>[Fe(CN)<sub>6</sub>]·H<sub>2</sub>O with Extremely High T<sub>1</sub>-Weighted Relaxivity: Towards Stable Cellular MR Probes Containing Two Coordinated Water Molecules on the Gd(III) Center

Vindya S. Perera,<sup>a</sup> Liu D. Yang,<sup>a</sup> Jihua Hao,<sup>b,c</sup> Guojun Chen,<sup>a,†</sup> Bernadette O. Erokwu<sup>b</sup>,  
Chris A. Flask,<sup>\*b,e,f</sup> Peter Y. Zavalij,<sup>\*d</sup> James P. Babilion,<sup>\*b,c,e</sup> Songping D. Huang<sup>\*a</sup>  
<sup>a</sup>Department of Chemistry and Biochemistry, Kent State University, Kent, OH 44240,  
USA. To whom correspondence should be addressed Fax: +1-330-672-3816; E-mail:  
shuangl@kent.edu

<sup>b</sup>Case Center for Imaging Research, Department of Radiology, Case Western Reserve  
University, Cleveland, OH 44106, USA

<sup>c</sup>NFCR for Molecular Imaging, Case Western Reserve University, Cleveland, OH 44106,  
USA

<sup>d</sup>Department of Chemistry and Biochemistry, University of Maryland, College Park, MD  
20742

<sup>e</sup>Department of Biomedical Engineering, Case Western Reserve University, Cleveland,  
OH 44106, USA

### Summary of structure determination for KGd(H<sub>2</sub>O)<sub>2</sub>[Fe(CN)<sub>6</sub>]·H<sub>2</sub>O

#### R-Values

R<sub>exp</sub> : 1.26      R<sub>wp</sub> : 1.87      R<sub>p</sub> : 1.41      GOF : 1.48

R<sub>exp</sub>` : 8.39      R<sub>wp</sub>` : 12.40      R<sub>p</sub>` : 19.27      DW : 0.96

#### Background

Chebyshev polynomial, No. Coefficients      12

#### Instrument

|                       |                   |
|-----------------------|-------------------|
| Powder Diffractometer | Bruker D8 Advance |
| Detector              | PSD: LynxEye      |
| Exposition            | 1sec              |
| Radiation             | CuKα, λ=1.54178 Å |

|                                  |        |
|----------------------------------|--------|
| Goniometer radius (mm)           | 217.5  |
| Linear PSD 2Th angular range (°) | 3      |
| FDS angle (°)                    | 0.5    |
| Beam spill, sample length (mm)   | 15     |
| Intensity corrected              |        |
| Simple axial model (mm)          | 5.1(2) |

### Corrections

|                              |           |
|------------------------------|-----------|
| Zero error                   | 0.024     |
| Specimen displacement        | -0.055(2) |
| LP Factor                    | 90        |
| Absorption (1/cm)            | 26.9(7)   |
| Sample Thickness (mm)        | 0.2       |
| Intensity correction applied |           |

### Structure 1

|                                         |                   |
|-----------------------------------------|-------------------|
| Phase name                              | K[GdFe(CN)6].3H2O |
| R-Bragg                                 | 1.27%             |
| Spacegroup                              | Pnma              |
| Scale                                   | 0.0002102(6)      |
| Cell Mass                               | 1825.21           |
| Cell Volume (Å <sup>3</sup> )           | 1244.63(7)        |
| Wt% - Rietveld                          | 100.000           |
| Crystallite Size Lorentzian (nm)        | 465(19)           |
| Strain Lorentzian                       | 0.125             |
| Crystal Linear Absorption Coeff. (1/cm) | 465.19(3)         |
| Crystal Density (g/cm <sup>3</sup> )    | 2.43513(13)       |
| Preferred Orientation (Dir 1 : 0 1 0)   | 1.23(3)           |
| (Dir 2 : 1 0 0)                         | 0.843(14)         |
| Fraction of Dir 1                       | 0.45(7)           |
| Lattice parameters                      |                   |

|       |             |
|-------|-------------|
| a (Å) | 12.6098 (4) |
| b (Å) | 13.6161 (4) |
| c (Å) | 7.2490 (3)  |

| Site | Np | x        | y       | z        | Atom | Occ | Beq   |
|------|----|----------|---------|----------|------|-----|-------|
| Gd   | 4  | 0.16014  | 0.25000 | -0.00846 | Gd   | 1   | 1.121 |
| Fe   | 4  | 0.50000  | 0.50000 | 0.00000  | Fe   | 1   | 1.287 |
| C1   | 8  | 0.38070  | 0.41230 | -0.01010 | C    | 1   | 1.816 |
| N1   | 8  | 0.30880  | 0.36020 | -0.00970 | N    | 1   | 2.763 |
| C2   | 8  | 0.41770  | 0.58710 | 0.14510  | C    | 1   | 1.816 |
| N2   | 8  | 0.36540  | 0.64070 | 0.23130  | N    | 1   | 2.606 |
| C3   | 8  | 0.54850  | 0.43280 | 0.21400  | C    | 1   | 1.737 |
| N3   | 8  | 0.57820  | 0.38840 | 0.34270  | N    | 1   | 2.763 |
| O1   | 4  | 0.22440  | 0.25000 | 0.32570  | O    | 1   | 2.763 |
| O2   | 4  | -0.04090 | 0.25000 | -0.09200 | O    | 1   | 3     |
| O3   | 8  | 0.16650  | 0.59000 | 0.01080  | O    | 0.5 | 4.422 |
| K    | 8  | 0.16770  | 0.57910 | -0.04510 | K    | 0.5 | 4.185 |

|      |      |    |    |    |         |
|------|------|----|----|----|---------|
| Gd:0 | N1:1 | 0  | -1 | 0  | 2.40112 |
|      | N1:0 | 0  | 0  | 0  | 2.40112 |
|      | N2:7 | -1 | -1 | 0  | 2.42436 |
|      | N2:6 | -1 | 0  | 0  | 2.42436 |
|      | N3:3 | 0  | -1 | -1 | 2.46226 |
|      | N3:2 | 0  | 0  | -1 | 2.46226 |
|      | O1:0 | 0  | 0  | 0  | 2.55421 |
|      | O2:0 | 0  | 0  | 0  | 2.60647 |

|      |      |    |    |   |         |
|------|------|----|----|---|---------|
| Fe:0 | C2:5 | -1 | -1 | 0 | 1.89469 |
|      | C2:0 | 0  | 0  | 0 | 1.89469 |

|      |      |    |    |    |         |
|------|------|----|----|----|---------|
|      | C3:0 | 0  | 0  | 0  | 1.90203 |
|      | C3:5 | -1 | -1 | 0  | 1.90203 |
|      | C1:5 | -1 | -1 | 0  | 1.92208 |
|      | C1:0 | 0  | 0  | 0  | 1.92208 |
| C1:0 | N1:0 | 0  | 0  | 0  | 1.15120 |
|      | Fe:0 | 0  | 0  | 0  | 1.92208 |
| N1:0 | C1:0 | 0  | 0  | 0  | 1.15120 |
|      | Gd:0 | 0  | 0  | 0  | 2.40112 |
| C2:0 | N2:0 | 0  | 0  | 0  | 1.16534 |
|      | Fe:0 | 0  | 0  | 0  | 1.89469 |
| N2:0 | C2:0 | 0  | 0  | 0  | 1.16534 |
|      | Gd:3 | -1 | -1 | -1 | 2.42436 |
| C3:0 | N3:0 | 0  | 0  | 0  | 1.17309 |
|      | Fe:0 | 0  | 0  | 0  | 1.90203 |
| N3:0 | C3:0 | 0  | 0  | 0  | 1.17309 |
|      | Gd:1 | -1 | 0  | -1 | 2.46226 |
| O1:0 | Gd:0 | 0  | 0  | 0  | 2.55421 |
|      | K:6  | -1 | 0  | -1 | 2.85365 |
|      | K:7  | -1 | -1 | -1 | 2.85365 |
| O2:0 | Gd:0 | 0  | 0  | 0  | 2.60647 |
|      | K:4  | 0  | 0  | 0  | 2.99319 |

|      |      |    |    |    |         |
|------|------|----|----|----|---------|
|      | K:5  | 0  | -1 | 0  | 2.99319 |
| O3:0 | K:0  | 0  | 0  | 0  | 0.43181 |
| K:0  | O3:0 | 0  | 0  | 0  | 0.43181 |
|      | O1:3 | -1 | -1 | 0  | 2.85365 |
|      | O2:2 | 0  | -1 | 0  | 2.99319 |
|      | N3:2 | 0  | 0  | -1 | 3.18883 |

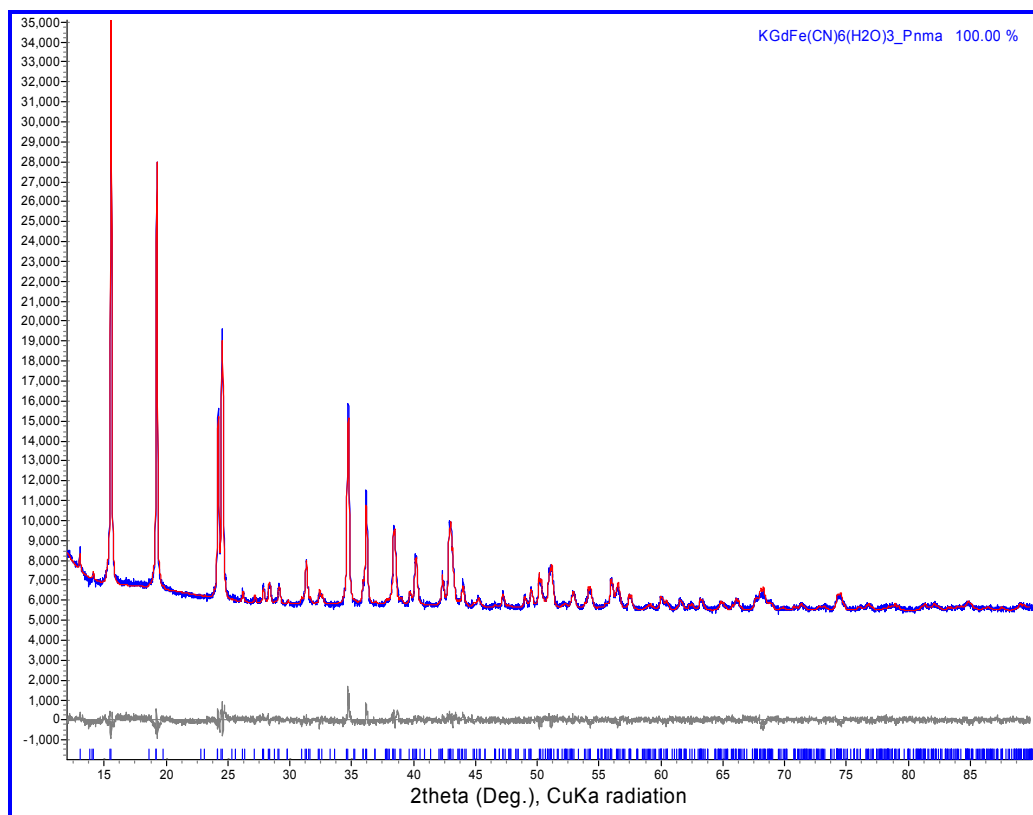

**Figure S1.** Rietveld refinement plot of  $\text{KGd}(\text{H}_2\text{O})_2[\text{Fe}(\text{CN})_6] \cdot \text{H}_2\text{O}$  with the difference between observed and calculated patterns shown at the bottom and the reflection positions shown as the vertical lines

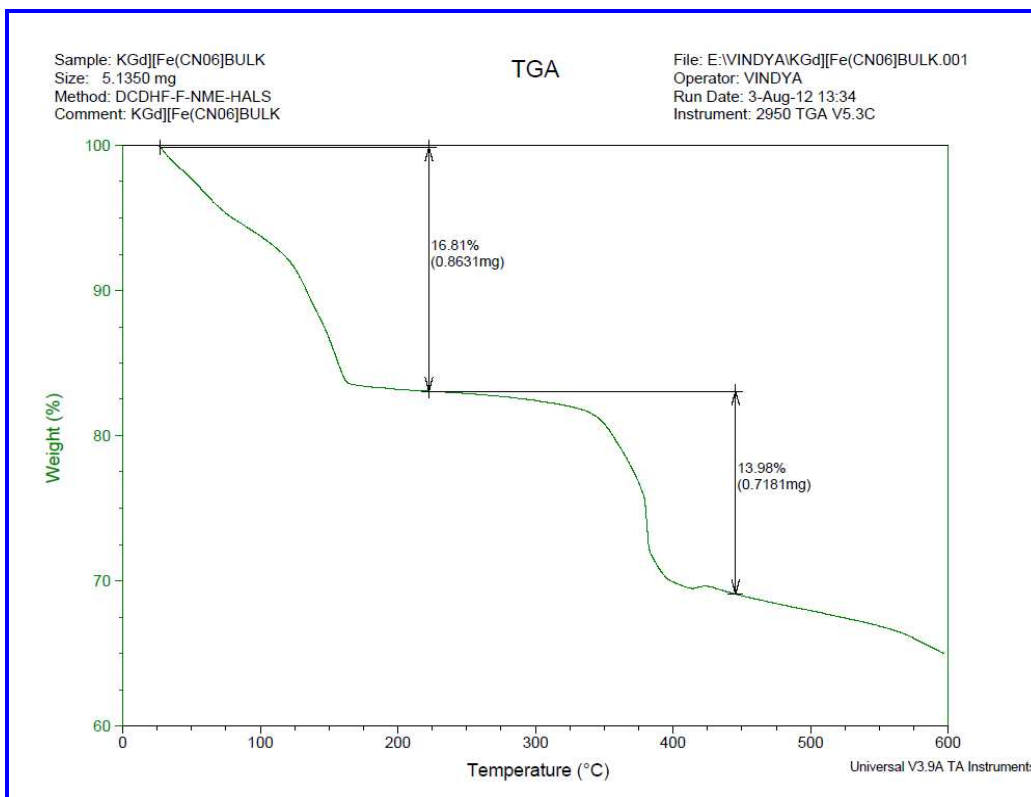

**Figure S2.** The TGA curve of bulk  $\text{KGd}(\text{H}_2\text{O})_2[\text{Fe}(\text{CN})_6] \cdot \text{H}_2\text{O}$  sample

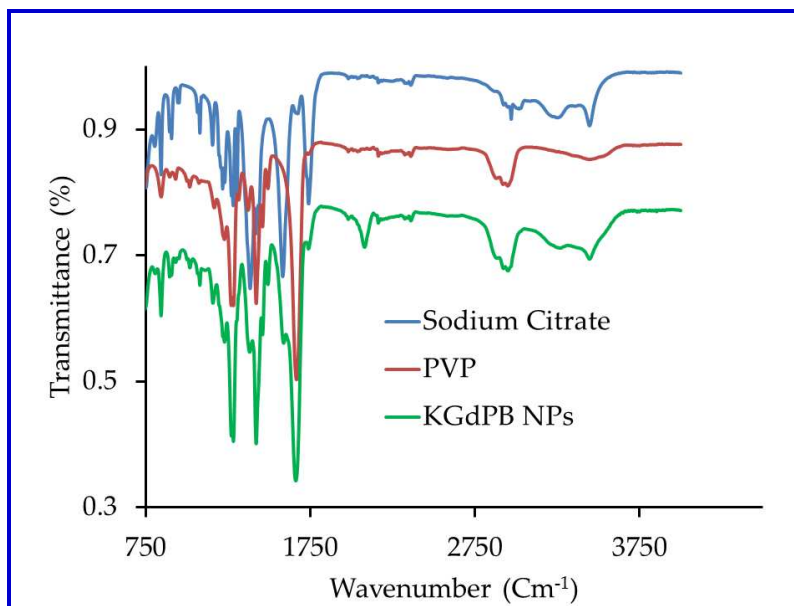

**Figure S3.** FT-IR spectra of sodium citrate, PVP and PVP-C-KGdFeCN NPs.

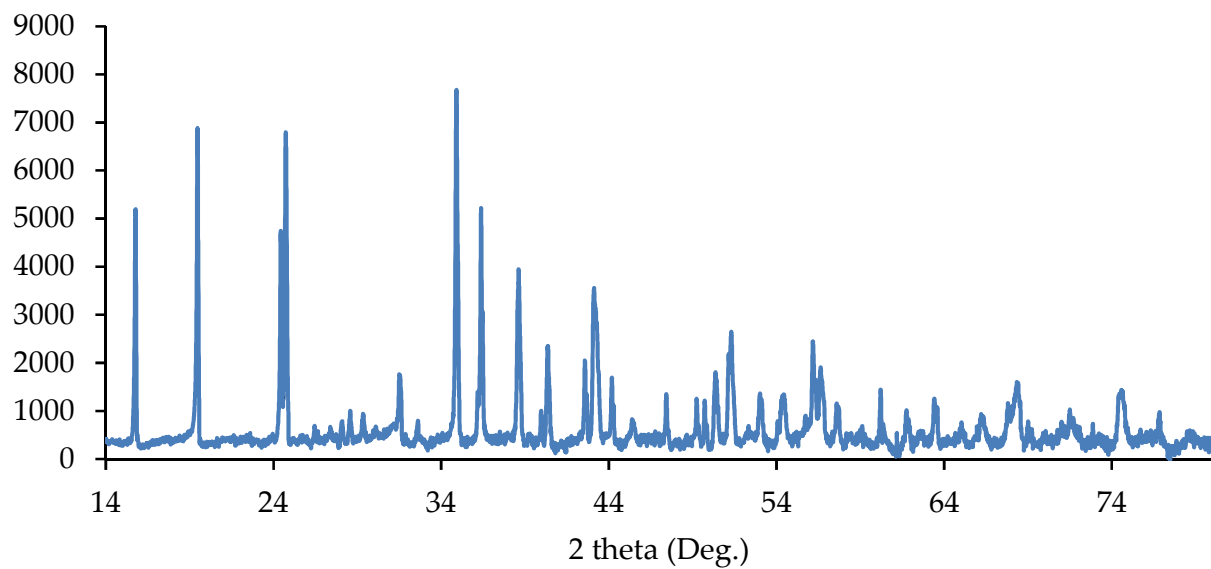

**Figure S4.** XRD Patterns of PVP-C-KGd(H<sub>2</sub>O)<sub>2</sub>[Fe(CN)<sub>6</sub>]·H<sub>2</sub>O

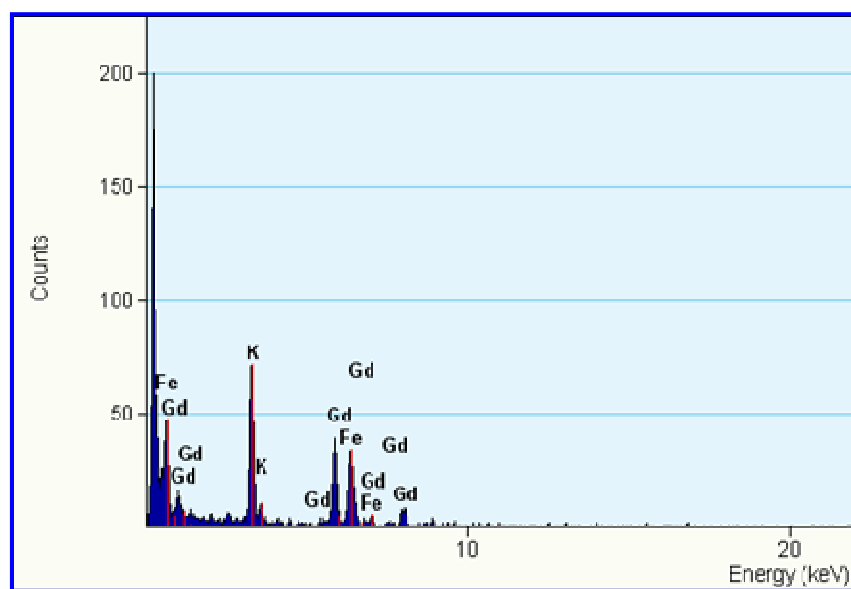

**Figure S5.** EDX spectrum on a typical PVP-coated nanoparticle

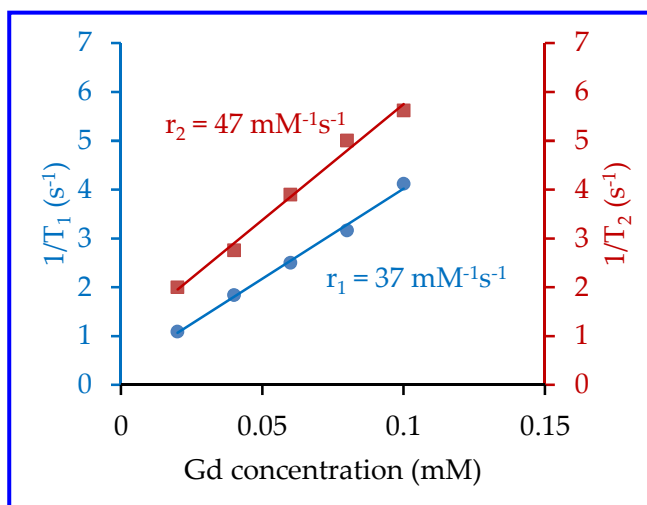

**Figure S6.** Plots of  $1/T_i$  ( $i=1,2$ ) versus  $Gd^{3+}$ -concentration at the magnetic field strength of 1.4 T for PVP-coated NPs.

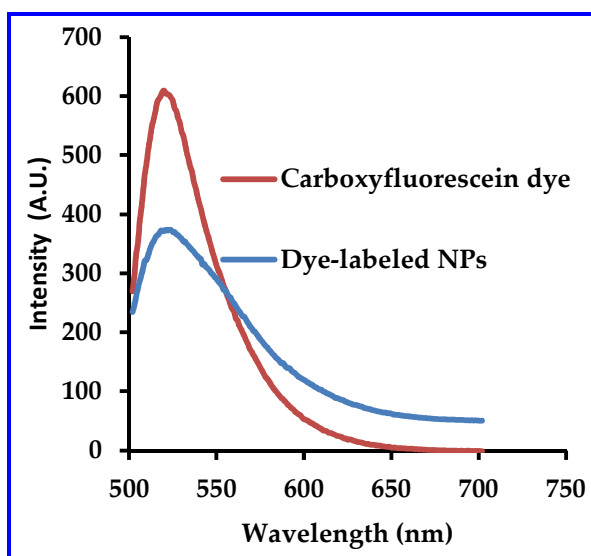

**Figure S7.** Fluorescence spectra of carboxyfluorescein dye and dye labeled nanoparticles.
